# Supplementary material
Source: publisher figshare collection journal article supplement (https://karger.figshare.com/articles/dataset/_/26014747)

**Supplementary Table 1**: Cohort patient characteristics of the Nottingham Primary Breast Cancer Series


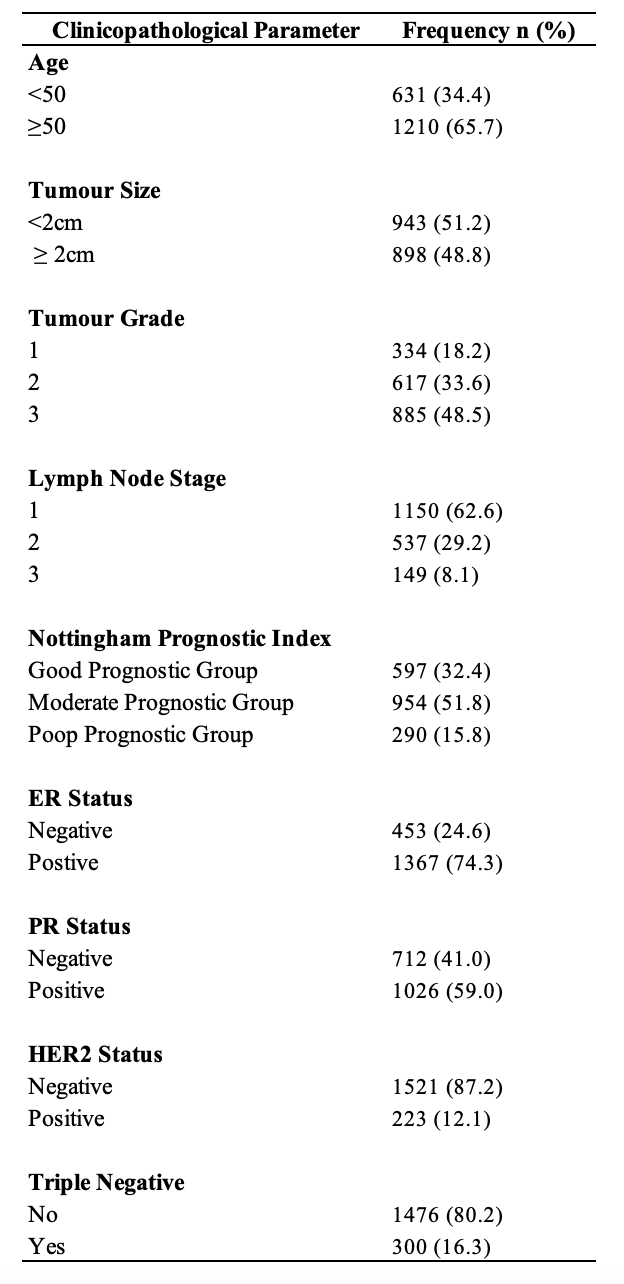

Supplement: Supplementary file 1 [file 1]
